# Supplementary material
Source: PubMed Central journal article supplement (PMC5510797)
Supplement: Supp_Fig1.pdf [file Supp_Fig1.pdf]

## Supplementary Data

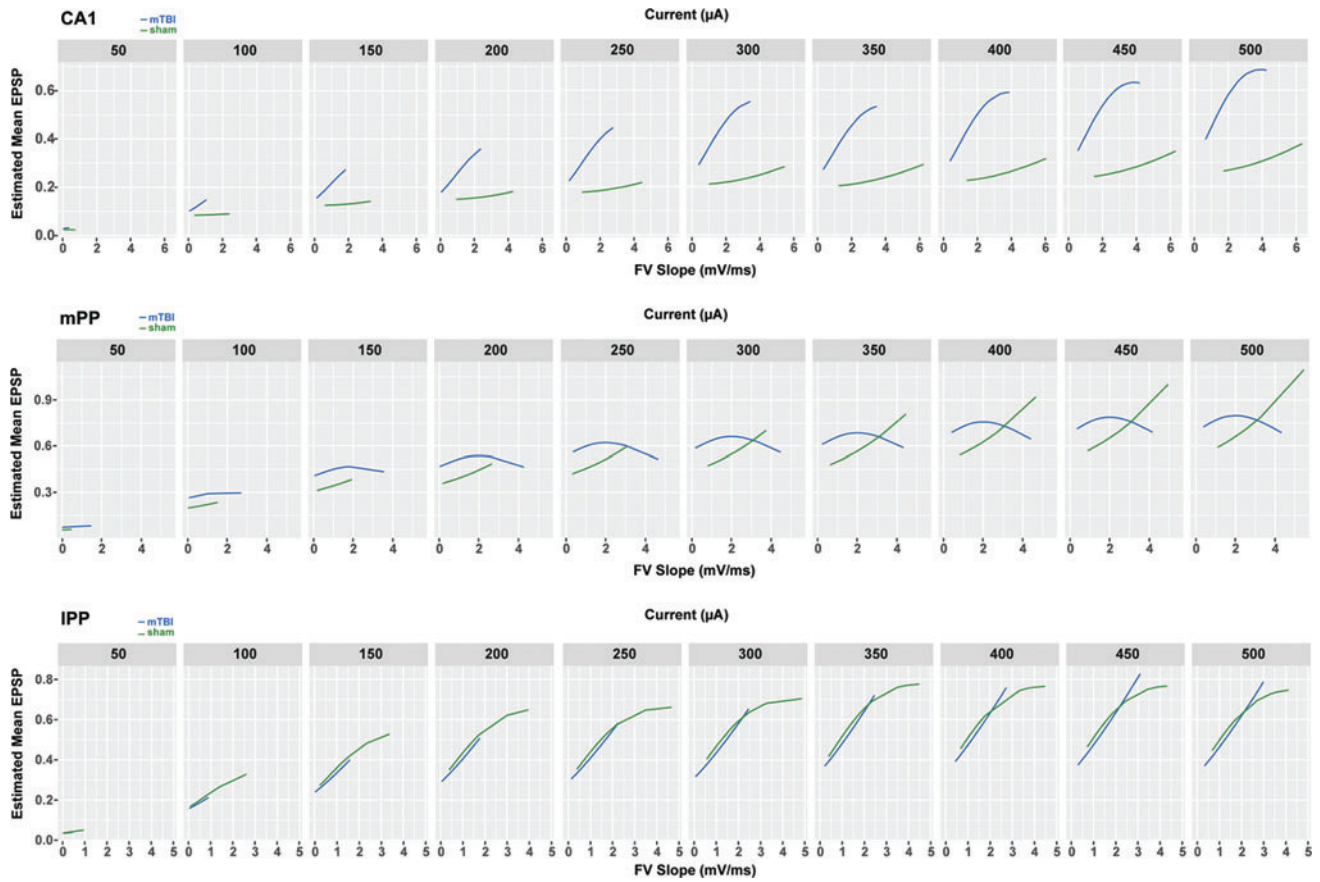

**SUPPLEMENTARY FIG. S1.** Fitted model for fiber volley (FV)/excitatory post-synaptic potential (EPSP) at each current level. For each current level, FV slope is plotted against the estimated mean EPSP based on the statistical model (see Methods). In addition to the FV/EPSP results presented in Figure 5, effects of current were noted for the CA1 model [ $F(9, 428)=30.2, p<0.0001$ ], the medial perforant path model [ $F(9, 437)=36.11, p<0.0001$ ] and in the lateral perforant path model [ $F(9, 437)=48.16, p<0.0001$ ].
